# Supplementary material for: Molecular, Physiological and Biochemical Responses of Theobroma cacao L. Genotypes to Soil Water Deficit
Source: PLoS One. 2014 Dec 26;9(12):e115746. doi: 10.1371/journal.pone.0115746 (PMC4277404; doi:10.1371/journal.pone.0115746)
Supplement: S4 Table — Activity of guaiacol peroxidase (GPX) and polyphenol oxidase (PPO) of T.cacao plants submitted to two watering regimes (well-watered and drought stress). (XLS) [file pone.0115746.s004.xls]

## Sheet: S4
Table S4- Activity of guaiacol peroxidase (GPX) and polyphenol oxidase (PPO) of T.cacao plants submitted to two watering regimes (well-watered and drought stress).
Genotype	Treatment		GPX			PPO
			mmol guaiacol g-1 DW h-1			mg epicateching DW-1 min -1
AMZ 15.1	Well-watered	173.822	±	2.41352	98.0468	±	3.99765
	Drought	398.589	±	8.30246	183.372	±	1.95532
BE- 08	Well-watered	275.638	±	5.29873	164.619	±	4.63237
	Drought	578.748	±	9.06232	109.233	±	0.641629
CSUL- 3	Well-watered	226.088	±	4.9824	106.812	±	3.16266
	Drought	351.83	±	1.53773	109.161	±	1.57205
CSUL -4	Well-watered	239.83	±	8.35545	109.918	±	0.877144
	Drought	548.962	±	9.22266	96.7703	±	1.00406
CA-1	Well-watered	223.322	±	4.27011	102.331	±	1.6583
	Drought	316.073	±	5.10174	141.075	±	4.24385
CA-3	Well-watered	353.49	±	8.81568	34.153	±	0.29873
	Drought	241.276	±	9.71182	103.423	±	2.42137
CAB-139	Well-watered	186.935	±	1.49487	94.3619	±	4.35017
	Drought	460.977	±	7.65276	92.8485	±	8.36724
CAB-274	Well-watered	321.957	±	6.55626	74.47	±	1.11701
	Drought	249.36	±	8.26949	114.958	±	0.967514
CAT	Well-watered	433.354	±	11.0485	106.798	±	5.12971
	Drought	369.495	±	3.88623	82.9518	±	1.58643
CC-40	Well-watered	439.55	±	6.55626	83.7283	±	0.588073
	Drought	340	±	5.26949	106.456	±	1.78575
EET-103	Well-watered	174.312	±	17.0548	49.5441	±	0.834753
	Drought	420.228	±	5.60831	102.778	±	5.96651
EET-53	Well-watered	464.51	±	3.70227	99.4681	±	1.34489
	Drought	634.899	±	15.3405	76.1676	±	0.785032
EQX-107	Well-watered	215.099	±	7.94322	96.4149	±	1.78217
	Drought	516.109	±	12.2773	104.436	±	0.766361
GU-114	Well-watered	176.789	±	5.09057	77.2731	±	1.48743
	Drought	443.638	±	4.14664	96.4281	±	2.29199
ICS-9	Well-watered	355.301	±	4.07688	86.6104	±	1.83118
	Drought	337.673	±	3.61312	132.797	±	4.59453
ICS-98	Well-watered	215.539	±	5.99693	87.9133	±	3.30855
	Drought	334.53	±	3.12825	139.364	±	0.974137
IMC-27	Well-watered	145.734	±	2.45491	49.9719	±	0.777216
	Drought	171.094	±	2.57457	43.3061	±	0.619693
IMC-76	Well-watered	250.366	±	6.18453	98.468	±	1.53347
	Drought	430.915	±	1.82909	102.107	±	2.58548
MA-14	Well-watered	319.669	±	0.807907	95.7503	±	1.46153
	Drought	609.074	±	9.28296	105.706	±	1.60957
MA-15	Well-watered	126.736	±	5.50902	90.5717	±	10.0889
	Drought	342.677	±	6.33993	102.146	±	0.332349
MO-20	Well-watered	167.586	±	1.93927	73.6935	±	1.48912
	Drought	484.136	±	6.97708	99.501	±	0.23087
MOC-2	Well-watered	296.019	±	1.53782	102.199	±	3.59498
	Drought	748.333	±	71.6509	158.874	±	4.68693
OC-77	Well-watered	302.67	±	25.8155	59.7303	±	0.744959
	Drought	407.416	±	4.56209	68.3964	±	1.20241
PA-13	Well-watered	673.372	±	27.1699	75.1806	±	1.25672
	Drought	615.096	±	10.6994	72.4235	±	1.1246
PA-150	Well-watered	207.065	±	8.87649	137.225	±	4.83547
	Drought	298.571	±	5.73253	137.192	±	2.94608
PS-1319	Well-watered	169.71	±	7.07333	119.413	±	2.62238
	Drought	498.608	±	8.50967	168.047	±	1.17852
RB-39	Well-watered	336.34	±	10.2959	56.5126	±	1.94697
	Drought	474.178	±	8.57665	102.028	±	3.18157
RB-48	Well-watered	130.935	±	3.12772	93.4407	±	1.94012
	Drought	167.41	±	2.37905	101.712	±	5.32271
RIM-6	Well-watered	337.95	±	1.93056	75.2267	±	1.00479
	Drought	698.267	±	3.12758	112.852	±	3.18547
SCA-6	Well-watered	183.189	±	5.5706	112.958	±	2.79816
	Drought	158.973	±	1.83031	64.8431	±	2.01819
SIAL-169	Well-watered	208.222	±	3.09894	111.306	±	0.426497
	Drought	278.744	±	3.73481	104.917	±	2.62741
SIC-17	Well-watered	285.093	±	3.93952	59.8158	±	1.32341
	Drought	598.827	±	5.09139	110.516	±	1.60298
SIC-2	Well-watered	250.668	±	9.48444	64.2706	±	1.8828
	Drought	200.904	±	20.4889	68.9492	±	0.511269
SPA-5	Well-watered	413.727	±	3.22095	96.336	±	1.57063
	Drought	648.691	±	14.6125	123.512	±	2.05094
TSA-792	Well-watered	145.457	±	2.44252	79.1616	±	3.75696
	Drought	300.558	±	3.73976	115.702	±	1.37355
TSH-1188	Well-watered	372.89	±	25.6321	118.952	±	1.15694
	Drought	544.876	±	5.70234	59.3355	±	1.6086
